# Supplementary material for: Current estimates of K 1 * and K 2 * appear inconsistent with measured CO 2 system parameters in cold oceanic regions
Source: Copernicus journal article supplement (doi:10.5194/os-2020-19), 2020-03-25
Supplement: Supplementary file 1 [file os-2020-19-supplement.pdf]

## Supplementary information

for

### “Current estimates of $K_1^*$ and $K_2^*$ appear inconsistent with measured CO<sub>2</sub> system parameters in cold oceanic regions”

Olivier Sulpis<sup>1,2</sup>, Siv K. Lauvset<sup>3</sup>, Mathilde Hagens<sup>4</sup>

<sup>1</sup>Department of Earth Sciences, Utrecht University, Utrecht, The Netherlands

<sup>2</sup>GEOTOP and Department of Earth and Planetary Sciences, McGill University, Montreal, QC H3A 0E8, Canada

<sup>3</sup>NORCE Norwegian Research Centre, Bjerknes Centre for Climate Research, Bergen, Norway

<sup>4</sup>Soil Chemistry and Chemical Soil Quality, Wageningen University and Research, Wageningen, The Netherlands

#### Table of contents

|                                                                                             |     |
|---------------------------------------------------------------------------------------------|-----|
| S1 Overview of past studies and derivations of the carbonic acid dissociation constants.... | p.2 |
| S2 Additional derivation of expressions for $K_1^*$ and $K_2^*$ .....                       | p.4 |
| S3 Reasons for discarding data from cruises #33AT20120419 and #49NZ20010828 .....           | p.5 |
| S4 Alternative iterative procedure .....                                                    | p.7 |
| Supplementary references.....                                                               | p.8 |

## S1 Overview of past studies and derivations of the carbonic acid dissociation constants

**Table S1.** Overview of most commonly used (i.e. included in most popular carbonate system calculation software) and recently published stoichiometric equilibrium constants at atmospheric pressure, and some of their properties and methodological details. Studies in italic indicate refits of previous studies.

| Reference                                                 | T range (°C)     | S <sub>P</sub> range | pH scale   | σ of fit                                                                             | Medium                                                                                               | Method                                                                                                                                                                                                                                                                             |
|-----------------------------------------------------------|------------------|----------------------|------------|--------------------------------------------------------------------------------------|------------------------------------------------------------------------------------------------------|------------------------------------------------------------------------------------------------------------------------------------------------------------------------------------------------------------------------------------------------------------------------------------|
| Mehrbach et al., 1973                                     | 2 to 35          | 19 to 43             | NBS        | lnK <sub>1</sub>                                                                     | Natural seawater (filtered at 0.45 μm)                                                               | Electrochemical cell with glass electrode and Hg–Hg <sub>2</sub> Cl <sub>2</sub> (calomel) reference electrode                                                                                                                                                                     |
| <i>M1973 refit by Dickson and Millero, 1987</i>           |                  |                      | SWS        |                                                                                      |                                                                                                      | <i>Recalculation of K<sub>2</sub>; reformulation on SWS scale</i>                                                                                                                                                                                                                  |
| <i>M1973 refit by Lueker et al., 2000</i>                 |                  |                      | T          |                                                                                      |                                                                                                      | <i>K<sub>2</sub> determined as by Dickson and Millero (1987); reformulated to total scale</i>                                                                                                                                                                                      |
| Hansson, 1973                                             | 5 to 30          | 20 to 40             | SWS        |                                                                                      | Artificial seawater (no Na <sub>2</sub> CO <sub>3</sub> )                                            | Electrochemical cell with glass electrode and Ag–AgCl reference electrode                                                                                                                                                                                                          |
| <i>H1973 refit by Dickson and Millero, 1987</i>           |                  |                      | SWS        |                                                                                      |                                                                                                      | <i>Corrected for deviations of the sulfate concentration and lack of fluoride in medium</i>                                                                                                                                                                                        |
| <i>M1973 and H1973 refit by Dickson and Millero, 1987</i> | 2 to 35          | 0 to 40              | SWS        |                                                                                      |                                                                                                      | <i>Pooling of 1973 and H1973 data sets at SWS scale</i>                                                                                                                                                                                                                            |
| Goyet and Poisson, 1989                                   | –1 to 40         | 10 to 50             | SWS        |                                                                                      | Artificial seawater (incl. Na <sub>2</sub> CO <sub>3</sub> )                                         | Electrochemical cell with glass electrode and Hg–Hg <sub>2</sub> Cl <sub>2</sub> (calomel) reference electrode                                                                                                                                                                     |
| Roy et al., 1993                                          | 0 to 45          | 5 to 45              | T          | ±0.0048 (lnK <sub>1</sub> <sup>*</sup> )<br>±0.0070 (lnK <sub>2</sub> <sup>*</sup> ) | Artificial seawater (no Na <sub>2</sub> CO <sub>3</sub> )                                            | Electrochemical cell (no liquid junction) with Pt–H <sub>2</sub> and Ag–AgCl electrodes                                                                                                                                                                                            |
| <i>Cai and Wang, 1998</i>                                 | <i>0.2 to 35</i> | <i>0 to 40</i>       | <i>NBS</i> |                                                                                      |                                                                                                      | <i>Refit of K<sub>1</sub> based on M1973 for S<sub>P</sub> &gt; 15 and Mook and Koene (1975) for S<sub>P</sub> &lt; 15, and refit of K<sub>2</sub> based on M1973 for S<sub>P</sub> &gt; 20 and Edmond and Gieskes (1970) for S<sub>P</sub> &lt; 20. T dependency as in M1973.</i> |
| Mojica Prieto and Millero, 2002                           | 0 to 45          | 5 to 42              | SWS        |                                                                                      | Artificial seawater (incl. Na <sub>2</sub> CO <sub>3</sub> ); natural seawater (filtered at 0.45 μm) | Electrochemical cell with glass electrode and Ag–AgCl reference electrode; spectrophotometer                                                                                                                                                                                       |

**Table S1.** (continued)

| <b>Reference</b>                 | <b>T range</b> | <b>S range</b> | <b>pH scale</b>  | <b><math>\sigma</math> of fit</b> | <b>Medium</b>                                                       | <b>Method</b>                                                                                |
|----------------------------------|----------------|----------------|------------------|-----------------------------------|---------------------------------------------------------------------|----------------------------------------------------------------------------------------------|
| Millero et al., 2002             | -1.6 to 35     | 34 to 37       | SWS              |                                   | Natural seawater                                                    | Concurrent measurements of TA, DIC, pH and pCO <sub>2</sub>                                  |
| Millero et al., 2006             | 0 to 50        | 1 to 50        | SWS              |                                   | Natural seawater (filtered at 0.45 $\mu$ m)                         | Electrochemical cell with glass electrode and Ag–AgCl reference electrode                    |
| <i>Millero, 2010</i>             | <i>0 to 50</i> | <i>1 to 50</i> | <i>SWS, T, F</i> |                                   |                                                                     | <i>Pooling of M1973, MPM2002 and M2006 data, recalculations on three different pH scales</i> |
| <i>Waters et al., 2013, 2014</i> | <i>0 to 45</i> | <i>5 to 45</i> | <i>SWS, T, F</i> |                                   |                                                                     | <i>Update from M2010 using a Pitzer ion-interaction model</i>                                |
| Tishchenko et al., 2013          | 0 to 30        | 1.5 to 40      | T                |                                   | Artificial seawater (incl. NaHCO <sub>3</sub> )                     | Electrochemical cell (no liquid junction) with pH-glass and Ag–AgCl electrodes               |
| Papadimitriou et al, 2018        | -6 to 25       | 33 to 100      | T                |                                   | Natural seawater, seawater-derived brines (filtered at 0.2 $\mu$ m) | Concurrent measurements of TA, DIC, pH and pCO <sub>2</sub>                                  |

## S2 Additional derivation of expressions for $K_1^*$ and $K_2^*$

The following section describes expressions for  $K_1^*$  and  $K_2^*$  as functions of any three variables of the set carbonate alkalinity ( $CA$ ), dissolved inorganic carbon ( $DIC$ ), partial pressure of  $CO_2$  ( $pCO_2$ ) and proton concentration ( $[H^+]$ ), and  $K_1^*$  (for  $K_2^*$ ) or  $K_2^*$  (for  $K_1^*$ ). These expressions were derived based on equations given by Dickson et al. (2007), who provide a comprehensive overview of carbonate system equations, based on  $CA$ ,  $DIC$ ,  $pCO_2$  and  $[H^+]$ , in their Chapter 2. Here, for brevity, their equations are not repeated, but are referred to as Eq. (D#), where # represents the equation number used in their chapter. Note that, in comparison to Dickson et al. (2007), we use  $H_2CO_3^*$  instead of  $CO_2^*$  to represent the sum of  $H_2CO_3$  and solvated  $CO_2$ . We also use  $pCO_2$  instead of  $fCO_2$ ; this difference is accounted for in the calculation of  $K_0$ .

Recall that  $K_1^*$  and  $K_2^*$  are normally defined in terms of  $[H^+]$ , and the acid-base species for which equilibrium they describe:

$$K_1^* = \frac{[HCO_3^-][H^+]}{[H_2CO_3^*]} \quad (S1)$$

$$K_2^* = \frac{[H^+][CO_3^{2-}]}{[HCO_3^-]} \quad (S2)$$

### S2.1 Expressions for $K_1^*$ and $K_2^*$ as a function of $DIC$ , $CA$ and $[H^+]$

To derive  $K_1^*$  as a function of this set of variables, we use Eq. (S1) and express  $[HCO_3^-]$  and  $[H_2CO_3^*]$  in terms of  $DIC$ ,  $CA$ ,  $[H^+]$  and  $K_2^*$ . For this, we use Eq. (D58) and Eq. (D87) for  $[HCO_3^-]$  and  $[H_2CO_3^*]$ , respectively. Upon substituting these equations into Eq. (S1) and multiplying the numerator and denominator by  $([H^+] + 2K_2^*)$ , we obtain the final expression for  $K_1^*$ :

$$K_1^* = \frac{CA[H^+]^2}{([H^+] + 2K_2^*)DIC - CA([H^+] + K_2^*)} \quad (S3)$$

The derivation of  $K_2^*$  is done in a similar manner. We use Eq. (S2) and replace  $[CO_3^{2-}]$  and  $[HCO_3^-]$  by Eq. (D85) and Eq. (D84), respectively. Both the numerator and denominator were then multiplied by  $(2[H^+] + K_1^*)$ , and the expression for  $K_2^*$  becomes:

$$K_2^* = \frac{[H^+]([H^+]CA + K_1^*CA - K_1^*DIC)}{K_1^*(2DIC - CA)} \quad (S4)$$

### S2.2 Expressions for $K_1^*$ and $K_2^*$ as a function of $CA$ , $[H^+]$ and $pCO_2$

Here, we again use Eq. (S1) to express  $K_1^*$  and replace  $[HCO_3^-]$  with Eq. (D58) and  $[H_2CO_3^*]$  with Eq. (D61). Upon multiplying the numerator and denominator by  $([H^+] + 2K_2^*)$ , we obtain:

$$K_1^* = \frac{CA[H^+]^2}{K_0pCO_2([H^+] + 2K_2^*)} \quad (S5)$$

In case of  $K_2^*$ , in Eq. (S2)  $[CO_3^{2-}]$  and  $[HCO_3^-]$  were replaced with Eq. (D90) and Eq. (D89), respectively. The numerator and denominator were then multiplied by  $2[H^+]$ , resulting in:

$$K_2^* = \frac{[H^+](CA[H^+] - K_0K_1^*pCO_2)}{2K_0K_1^*pCO_2} \quad (S6)$$

*S2.3 Expressions for  $K_1^*$  and  $K_2^*$  as a function of DIC,  $[H^+]$  and  $pCO_2$*

In this variable set, to derive an equation for  $K_1^*$ ,  $[HCO_3^-]$  can be expressed by Eq. (D93), while  $[H_2CO_3^*]$  is again replaced with Eq. (D61). Upon substituting this into Eq. (S1) and multiplying both the numerator and denominator by  $([H^+] + K_2^*)$  we obtain:

$$K_1^* = \frac{[H^+]^2(DIC - K_0pCO_2)}{K_0fCO_2([H^+] + K_1^*)} \quad (S7)$$

For  $K_2^*$ , we replace  $[CO_3^{2-}]$  by Eq. (D94) and  $[HCO_3^-]$  by Eq. (D92). Upon multiplying the numerator and denominator by  $[H^+]$ , we obtain:

$$K_2^* = \frac{[H^+](DIC[H^+] - K_0pCO_2[H^+] - K_0K_1^*pCO_2)}{K_0K_1^*pCO_2} \quad (S8)$$

*S2.4 Expressions for  $K_1^*$  and  $K_2^*$  as a function of DIC, CA and  $pCO_2$*

This set of variables does not allow for separate expressions for  $K_1^*$  and  $K_2^*$ . Rather, a single equation is derived, which should be solved for  $K_1^*$  and  $K_2^*$  sequentially using a Newton-Raphson technique. This single equation is derived by combining Eq. (D17) and Eq. (D53), the respective definitions of DIC and CA, into:

$$2DIC - CA = 2[H_2CO_3^*] + [HCO_3^-] \quad (S9)$$

Then, we subtract  $(2DIC - CA)$  from both the left- and right-hand sides of Eq. (S9), replace  $[HCO_3^-]$  by Eq. (D79) and express  $[H_2CO_3^*]$  again through Eq. (D61), leading to:

$$2K_0pCO_2 + \frac{1}{2} \left( -\frac{K_1^*}{K_2^*}K_0pCO_2 + \sqrt{\left(\frac{K_1^*}{K_2^*}K_0pCO_2\right)^2 - 4\frac{K_1^*}{K_2^*}K_0pCO_2(K_0pCO_2 - DIC)} \right) - 2DIC + CA = 0 \quad (S10)$$

### **S3 Reasons for discarding cruises #33AT20120419 and #49NZ20010828**

In Fig. S1, we show  $[H_2CO_3^*]$ ,  $[HCO_3^-]$  and  $[CO_3^{2-}]$  as a function of temperature and salinity as computed using the Lueker et al. (2000) dissociation constants and with six different carbonate variable pairs, to study carbonate system interconsistency in the different cruises that constitute our dataset. All data are from the top 5 meters of the water column, quality-controlled, and associated with a WOCE flag of 2 (i.e., “acceptable”). From Fig. S1, we see that for cruises #33AT20120419 and #49NZ20010828, the computed concentration of carbonate species can be very different depending on the input pair.

For cruise #49NZ20010828, the three pairs involving  $pH$  ( $pCO_2$ - $pH$ ,  $DIC$ - $pH$  and  $TA$ - $pH$ ) yield very different results, while the three pairs that do not include  $pH$  appear to be interconsistent. Cruise #49NZ20010828 (GLODAP code #478) was not considered for carbon interconsistency checks, as seen in the GLODAP adjustment table (accessible on <https://glodapv2.geomar.de/adjustments/list>), because according to the adjustment table, there were

only a few shallow profiles to compare. The quality controller for this cruise noted that there “seem to be an offset” in the  $pH$  data and that perhaps the correct flag should be “poor data”.

For cruise #33AT20120419, we see in Fig. S1 that the three pairs that include  $pCO_2$  as a variable yield very different  $[H_2CO_3^*]$ ,  $[HCO_3^-]$  and  $[CO_3^{2-}]$  values than the three pairs without  $pCO_2$  data. This would go in the sense of an erroneous  $pCO_2$  dataset for this cruise. During carbon interconsistency checks, the  $pH$  from cruise #33AT20120419 (GLODAP code #330) was corrected by adding a constant value of 0.012. This procedure is quite common for GLODAP data and we did not see any particular comment or warning for this dataset in the GLODAP adjustment table. Given the apparent inconsistency of the carbonate system highlighted here for this cruise, it was not included in the dataset that we used to derive the dissociation constants.

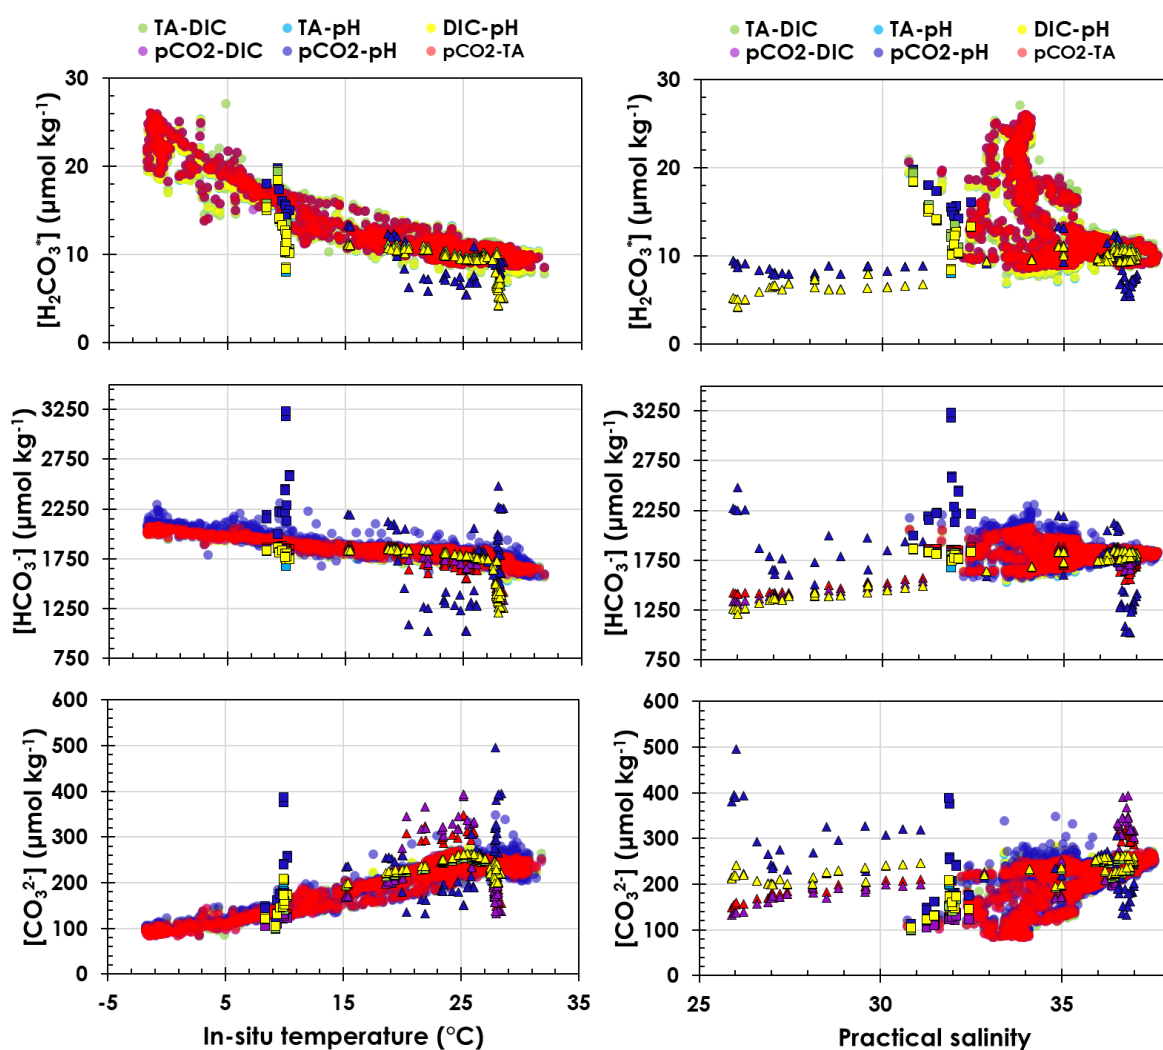

**Figure S1.**  $[H_2CO_3^*]$ ,  $[HCO_3^-]$  and  $[CO_3^{2-}]$  as a function of (left) in-situ temperature and (right) practical salinity, as computed with 6 different carbonate system variable pairs: TA-DIC (light green), TA-pH (light blue), DIC-pH (yellow),  $pCO_2$ -DIC (purple),  $pCO_2$ -pH (dark blue) and  $pCO_2$ -TA (red).

Circles represents the 948 data points used for our analysis, squares are data from cruise #33AT20120419 (GLODAP code #330) and triangles are data from cruise #49NZ20010828 (GLODAP code #478).

## S4 Alternative iterative procedure

Since there are only two pH-independent parameters ( $DIC$ ,  $pCO_2$ ), we can use these two parameters and one pH-dependent parameter (either  $pH$  itself or  $CA$ ) to initialise the iterative procedure. This implies that either  $K_1^*$  or  $K_2^*$  must be assigned an initial value, before starting the iterations. Here, we present an alternative iterative fitting procedure, in which in situ  $K_1^*$  rather than  $K_2^*$  was initially set to Lueker et al. (2000). Again, each iteration consisted of four different steps.

(1) First,  $K_2^*$  was computed from in situ  $DIC$ ,  $CA$ ,  $pCO_2$  and  $K_1^*$  from Lueker et al. (2000) and subsequently fitted (see details in the main text) to a general expression as a function of temperature and salinity of the form:

$$pK_{1 \text{ or } 2}^* = a_1 + a_2 S_P + a_3 S_P^2 + \frac{a_4}{T} + a_5 \ln(T) \quad (S11)$$

where  $pK_i^*$  corresponds to  $-\log_{10}(K_i)$  and  $a_i$  are fitting coefficients determined using nonlinear least-squares estimates (function *nlsLM*).

(2) Second, this new expression for  $K_2^*$ , and  $CA$  and the expression for  $K_1^*$  used in step 1 were used to compute  $pH$  at in situ temperature, see details for this procedure in the main text.

(3) Third,  $CA$  – that is dependent on  $pH$  – is updated based on the new  $[H^+]$ , as per Eq. (6) of the main text and the method outlined for the initial calculation of  $CA$ .

(4) Fourth, we use Eq. (8) of the main text to calculate  $K_1^*$  as a function of  $pCO_2$ ,  $DIC$ , and the new  $pH$  and  $CA$ , and fit these in-situ computed constants to an equation of the form of Eq. (S11).

These four steps are repeated and at each iteration,  $K_1^*$ ,  $CA$ , and  $pH$  from the previous iteration are used as initial values.

The coefficients  $a_n$  for  $pK_1^*$  and  $pK_2^*$  obtained with this procedure, in an equation of the form of Eq. (S11), and after 30 iterations, are reported in Table S2, along with their respective confidence intervals. In both expressions, all coefficients were significantly different from zero (p values < 0.001).

**Table S2.** Coefficients for  $pK_1^*$  and  $pK_2^*$  using an equation of the form of Eq. (S11), for a situation where  $K_1^*$  is initially set to the Lueker et al. (2000) value. Coefficients are given as value  $\pm$  95% confidence interval

|       | $pK_1^*$                                 | $pK_2^*$                                 |
|-------|------------------------------------------|------------------------------------------|
| $a_1$ | <b>- 170.233 <math>\pm</math> 8.898</b>  | <b>- 47.191 <math>\pm</math> 14.308</b>  |
| $a_2$ | - 0.011555                               | - 0.01781                                |
| $a_3$ | 0.0001152                                | 0.0001122                                |
| $a_4$ | <b>8421.155 <math>\pm</math> 388.159</b> | <b>3693.155 <math>\pm</math> 626.060</b> |
| $a_5$ | <b>25.994 <math>\pm</math> 1.333</b>     | <b>7.768 <math>\pm</math> 2.143</b>      |

In Fig. S2, we show a comparison of our pK values when  $K_2^*$  is initially set to the value of Lueker et al. (2000) (as presented in the main text of this manuscript, see Table 1) with our pK values

when  $K_1^*$  is initially set to the value of Lueker et al. (2000) (as presented in this section, see Table S2). Regardless of the K value that is initially set to the value of Lueker et al. (2000), both our pK fits are statistically indistinguishable, and higher than the Lueker et al. (2000) values at low temperatures.

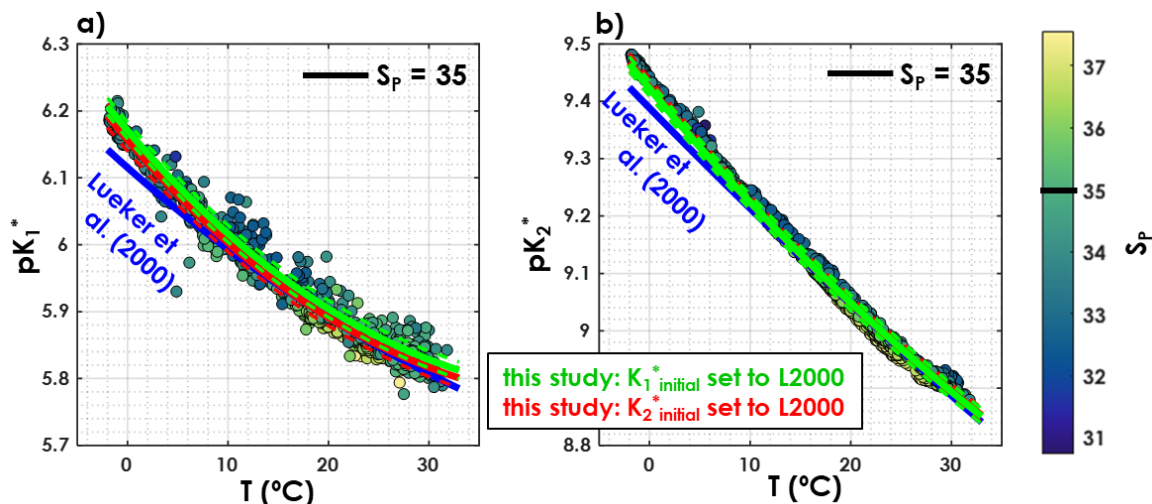

**Figure S2.** (a)  $pK_1^*$  and (b)  $pK_2^*$  as a function of temperature where the colour represents practical salinity ( $S_p$ ), and the fits are fixed for a  $S_p$  of 35. The solid blue line represents the  $pK^*$  fits from Lueker et al. (2000), the solid red line the  $pK^*$  from this study computed with the coefficients presented in Table 1, the solid green line the  $pK^*$  from this study computed with the coefficients presented in Table S2. Dashed lines are overall uncertainties for each of our  $pK$  fits, as defined in section 2.4.

### Supplementary references

Cai, W.-J., Wang, Y. 1998. The chemistry, fluxes, and sources of carbon dioxide in the estuarine waters of the Satilla and Altamaha Rivers, Georgia. *Limnol. Oceanogr.* 43(4), 657-668.

Dickson, A.G., Millero, F.J. 1987. A comparison of the equilibrium constants for the dissociation of carbonic acid in seawater media. *Deep-Sea Res.* 34(10), 1733-1743.

Dickson, A.G.; Sabine, C.L., Christian, J.R. 2007. Guide to best practices for ocean  $CO_2$  measurement. Sidney, British Columbia, North Pacific Marine Science Organization, 191pp. PICES Special Publication 3. <http://hdl.handle.net/11329/249>

Edmond, J.M., Gieskes, J.M.T.M. 1970. On the calculation of the degree of saturation of sea water with respect to calcium carbonate under in situ conditions. *Geochim. Cosmochim. Ac.* 34, 1261-1291.

Goyet, C., Poisson, A. 1989. New determination of carbonic acid dissociation constants in seawater as a function of temperature and salinity. *Deep-Sea Res.* 36(11), 1635-1654, [https://doi.org/10.1016/0198-0149\(89\)90064-2](https://doi.org/10.1016/0198-0149(89)90064-2)

Hansson, I. 1973. A new set of acidity constants for carbonic acid and boric acid in sea water. *Deep-Sea Res.* 20, 461-478.

Lueker, T.J., Dickson, A.G., Keeling, C.D. 2000. Ocean  $pCO_2$  calculated from dissolved inorganic carbon, alkalinity, and equations for  $K_1$  and  $K_2$ : validation based on laboratory measurements of  $CO_2$  in gas and seawater at equilibrium. *Mar. Chem.* 70(1-3), 105-119.



- Mehrbach, C., Culberson, C.H., Hawley, J.E., Pytkowicz, R.M. 1973. Measurement of the apparent dissociation constants of carbonic acid in seawater at atmospheric pressure. *Limnol. Oceanogr.* 18(6), 897-907.
- Millero, F.J., Pierrot, D., Lee, K., Wanninkhof, R., Feely, R., Sabine, C.L., Key, R.M., Takahashi, T. 2002. Dissociation constants for carbonic acid determined from field measurements. *Deep-Sea Res. Pt. I*, 49, 1705-1723.
- Millero, F.J., Graham, T.B., Huang, F., Bustos-Serrano, H., Pierrot, D. 2006. Dissociation constants of carbonic acid in seawater as a function of salinity and temperature. *Mar. Chem.* 100(1-2), 80-94, <https://doi.org/10.1016/j.marchem.2005.12.001>
- Millero, F.J. 2010. Carbonate constants for estuarine waters. *Mar. Freshwater Res.* 61, 139–142
- Mojica Pietro, F.J., Millero, F.J. 2002. The values of  $pK_1 + pK_2$  for the dissociation of carbonic acid in seawater. *Geochim. Cosmochim. Ac.* 66(14), 2529-2540.
- Mook, W.G., Koene, B.K.S. 1975. Chemistry of dissolved inorganic carbon in estuarine and coastal brackish waters. *Estuarine and Coastal Marine Science* 3, 325-336.
- Papadimitriou, S., Loucaides, S., Rérolle, V.M.C., Kennedy, P., Achterberg, E.P., Dickson, A.G., Mowlem, M., Kennedy, H. 2018. The stoichiometric dissociation constants of carbonic acid in seawater brines from 298 to 267 K. *Geochim. Cosmochim. Ac.* 220, 55-70, <https://doi.org/10.1016/j.gca.2017.09.037>
- Roy, R.N., Roy, L.N., Vogel, K.M., Porter-Moore, C., Pearson, T., Good, C.E., Millero, F.J., Campbell, D.M. 1993. The dissociation constants of carbonic acid in seawater at salinities 5 to 45 and temperatures 0 to 45°C. *Mar. Chem.* 44, 249-267.
- Tishchenko, P.Y., Wong, C.S., Johnson, W.K. 2013. Measurements of Dissociation Constants of Carbonic Acid in Synthetic Seawater by Means of a Cell Without Liquid Junction. *J. Solution Chem.* 42(11), 2168-2186, <https://doi.org/10.1007/s10953-013-0094-7>
- Waters, J.F., Millero, F.J. 2013. The free proton concentration scale for seawater pH. *Mar. Chem.* 149, 8-22.
- Waters, J.F., Millero, F.J., Woosley, R.J. 2014. Corrigendum to “The free proton concentration scale for seawater pH”, [*MARCHE*: 149 (2013) 8-22. *Mar. Chem.* 165, 66-67.
